# Supplementary material for: Influence of minor hydrocarbon seepage on sulfur cycling in marine subsurface sediments
Source: Copernicus journal article supplement (doi:10.5194/bg-22-767-2025), 2025-02-12
Supplement: Supplementary file 1 [file bg-22-767-2025-supplement.pdf]

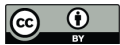

*Supplement of*

## **Influence of minor hydrocarbon seepage on sulfur cycling in marine subsurface sediments**

**Ellen Schnabel et al.**

*Correspondence to:* Jens Kallmeyer ([kallm@gfz-potsdam.de](mailto:kallm@gfz-potsdam.de))

The copyright of individual parts of the supplement might differ from the article licence.

● Measured SO<sub>4</sub> concentration ● Measured SRR  
— Modeled SO<sub>4</sub> concentration — Modeled SRR

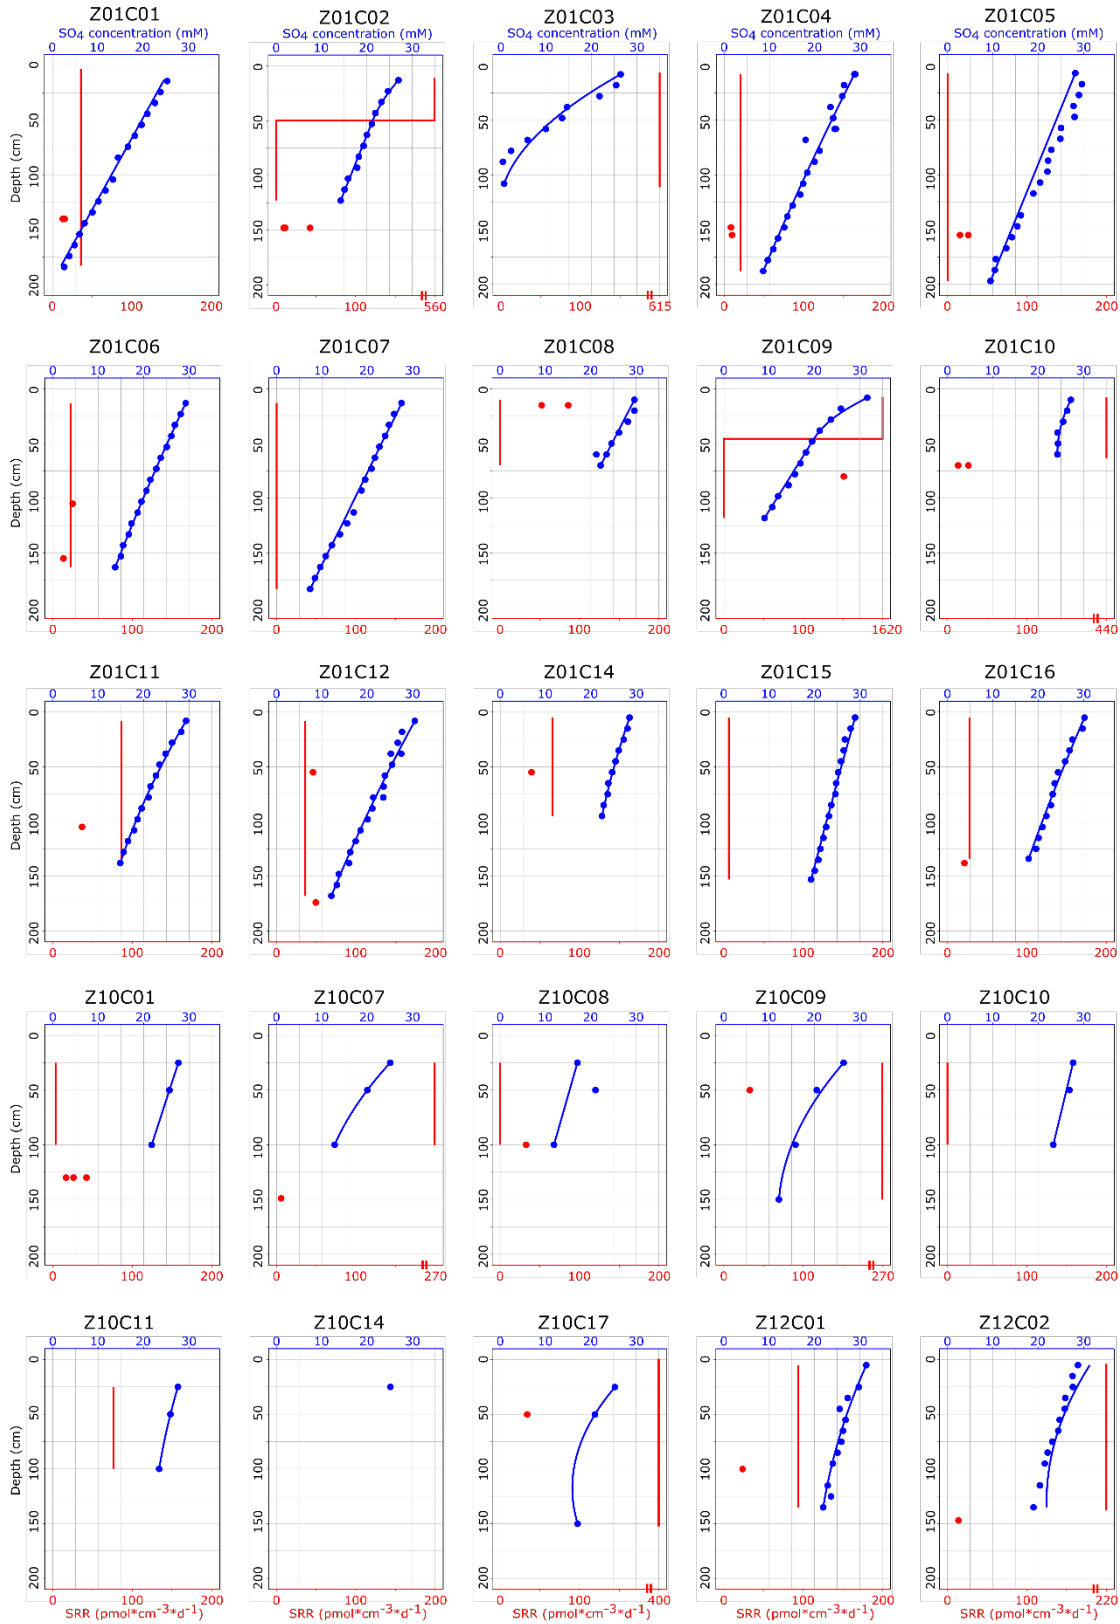

● Measured SO<sub>4</sub> concentration ● Measured SRR  
— Modeled SO<sub>4</sub> concentration — Modeled SRR

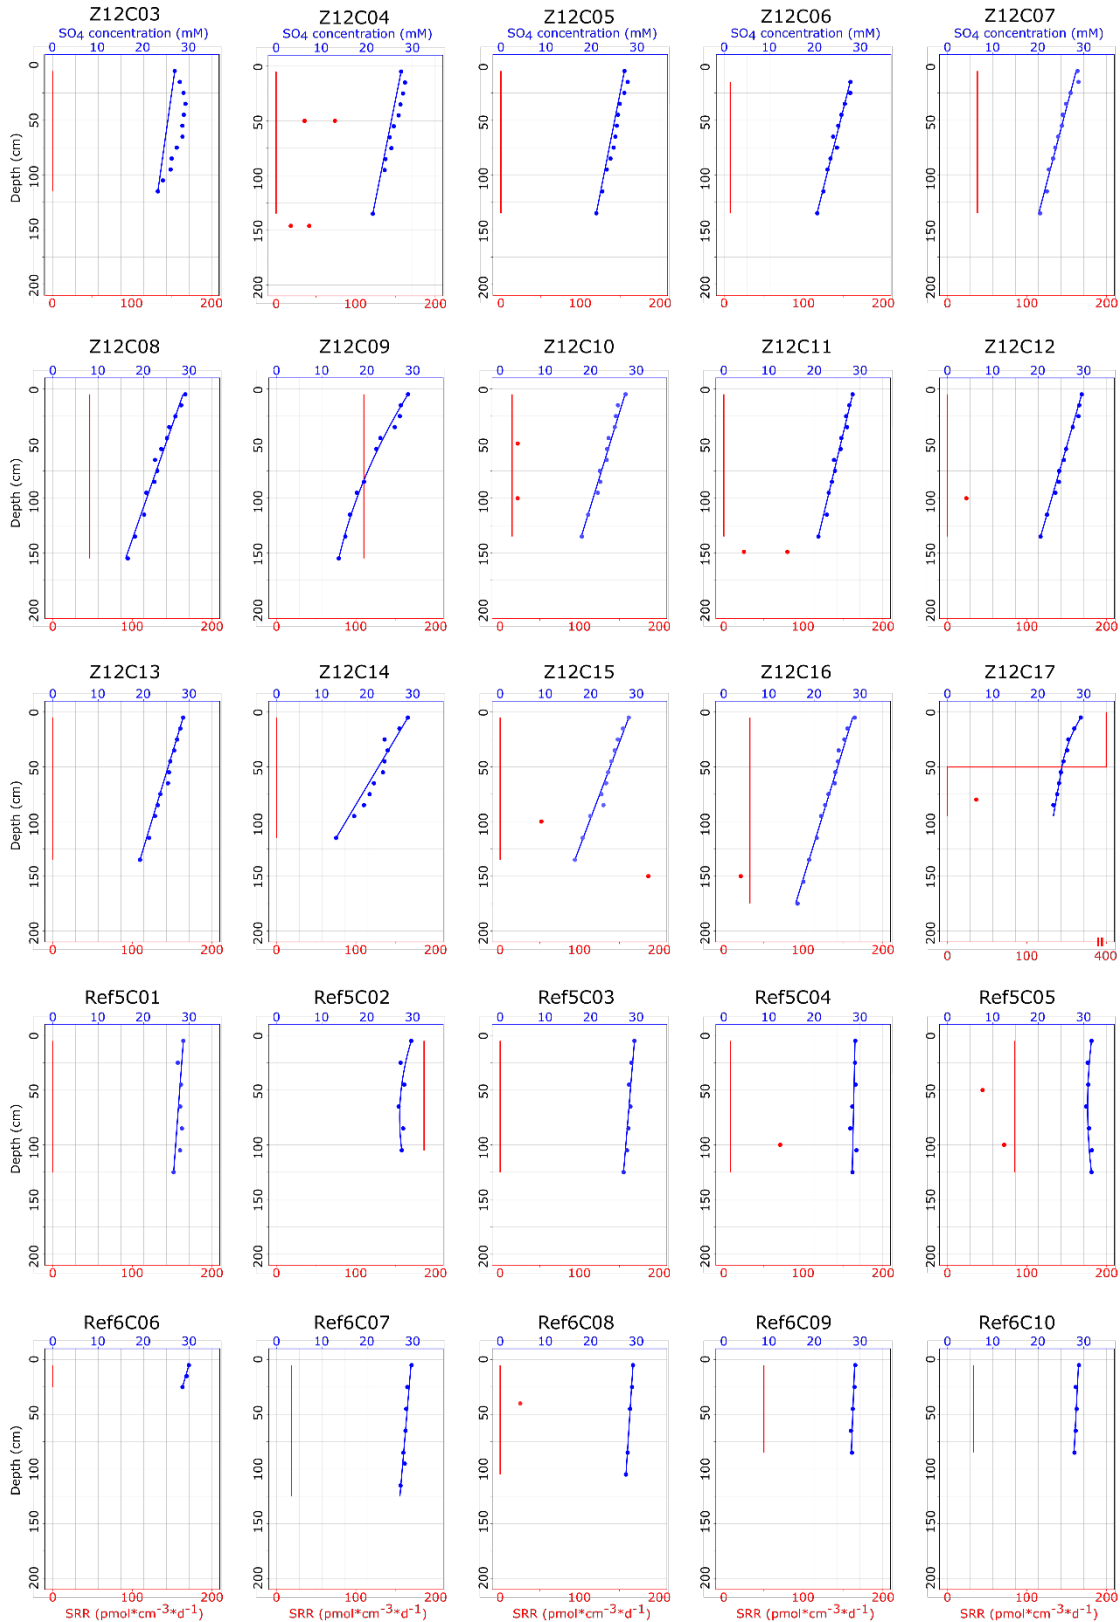

**Supplementary Figure S1.** Measured pore water sulfate concentrations (blue dots) and modelled sulfate reduction rates (red lines) and sulfate concentrations (blue lines).

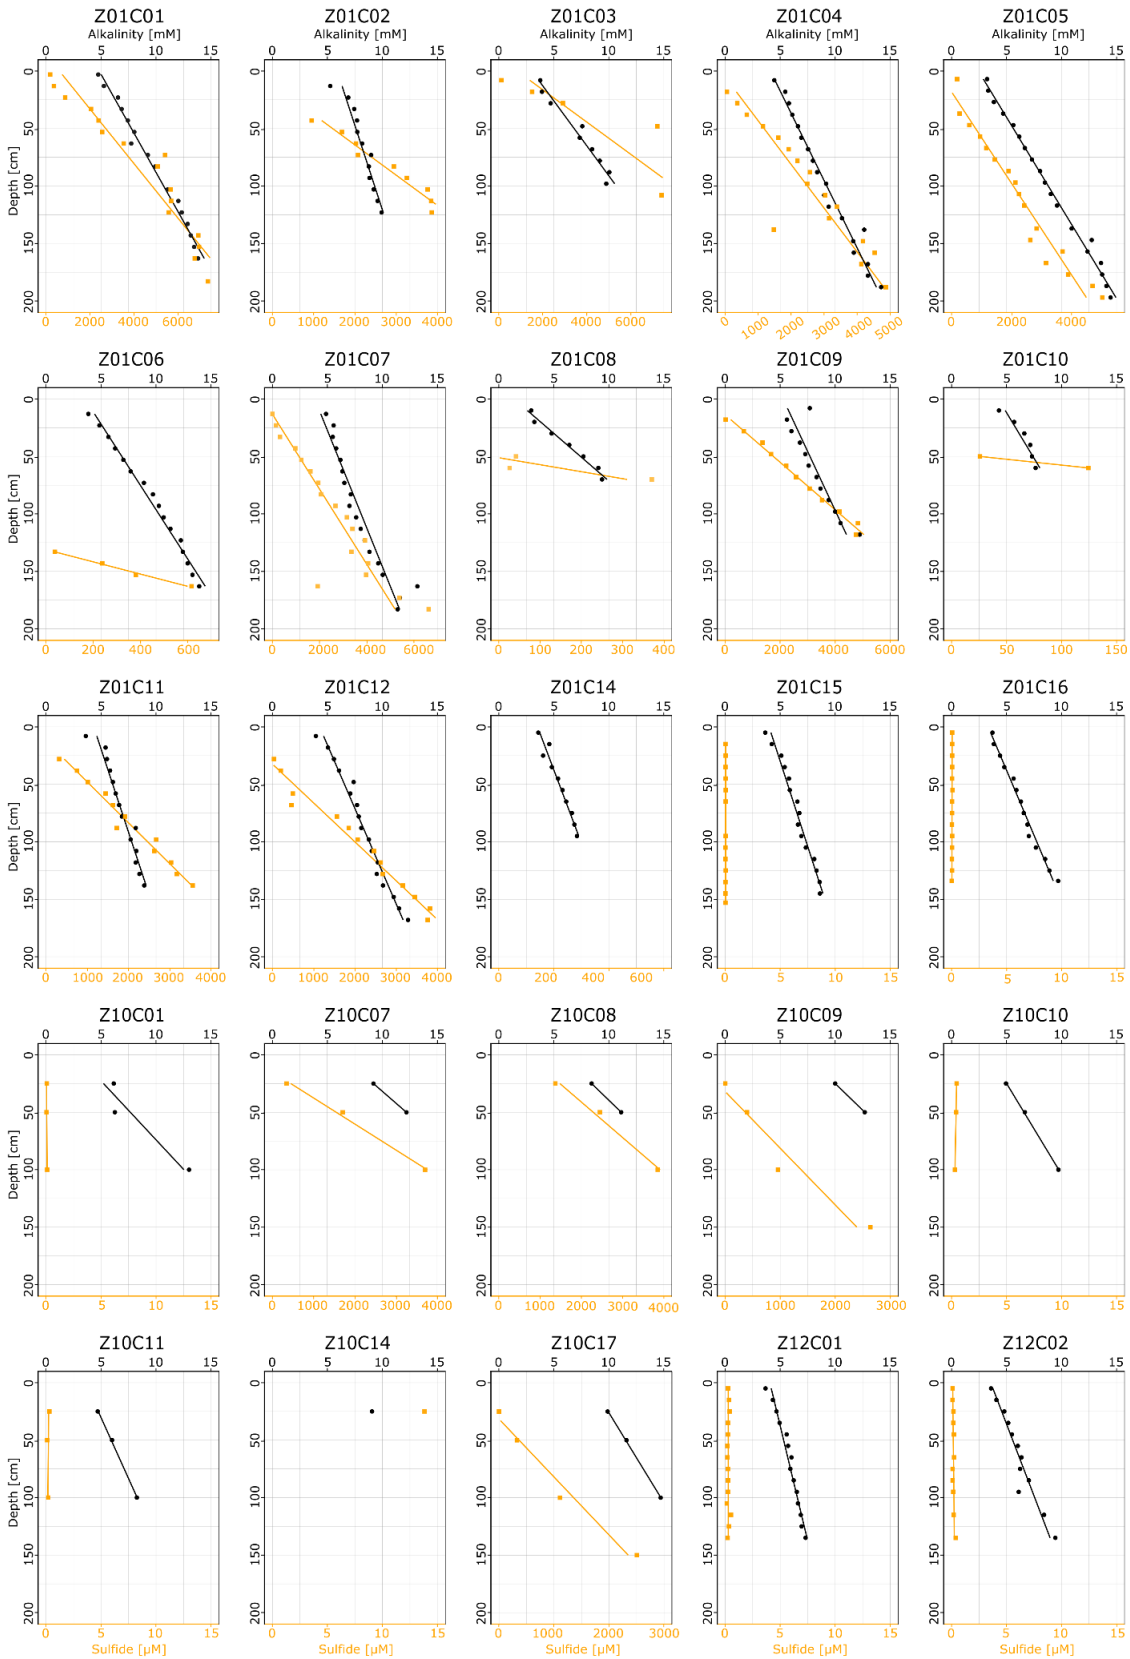

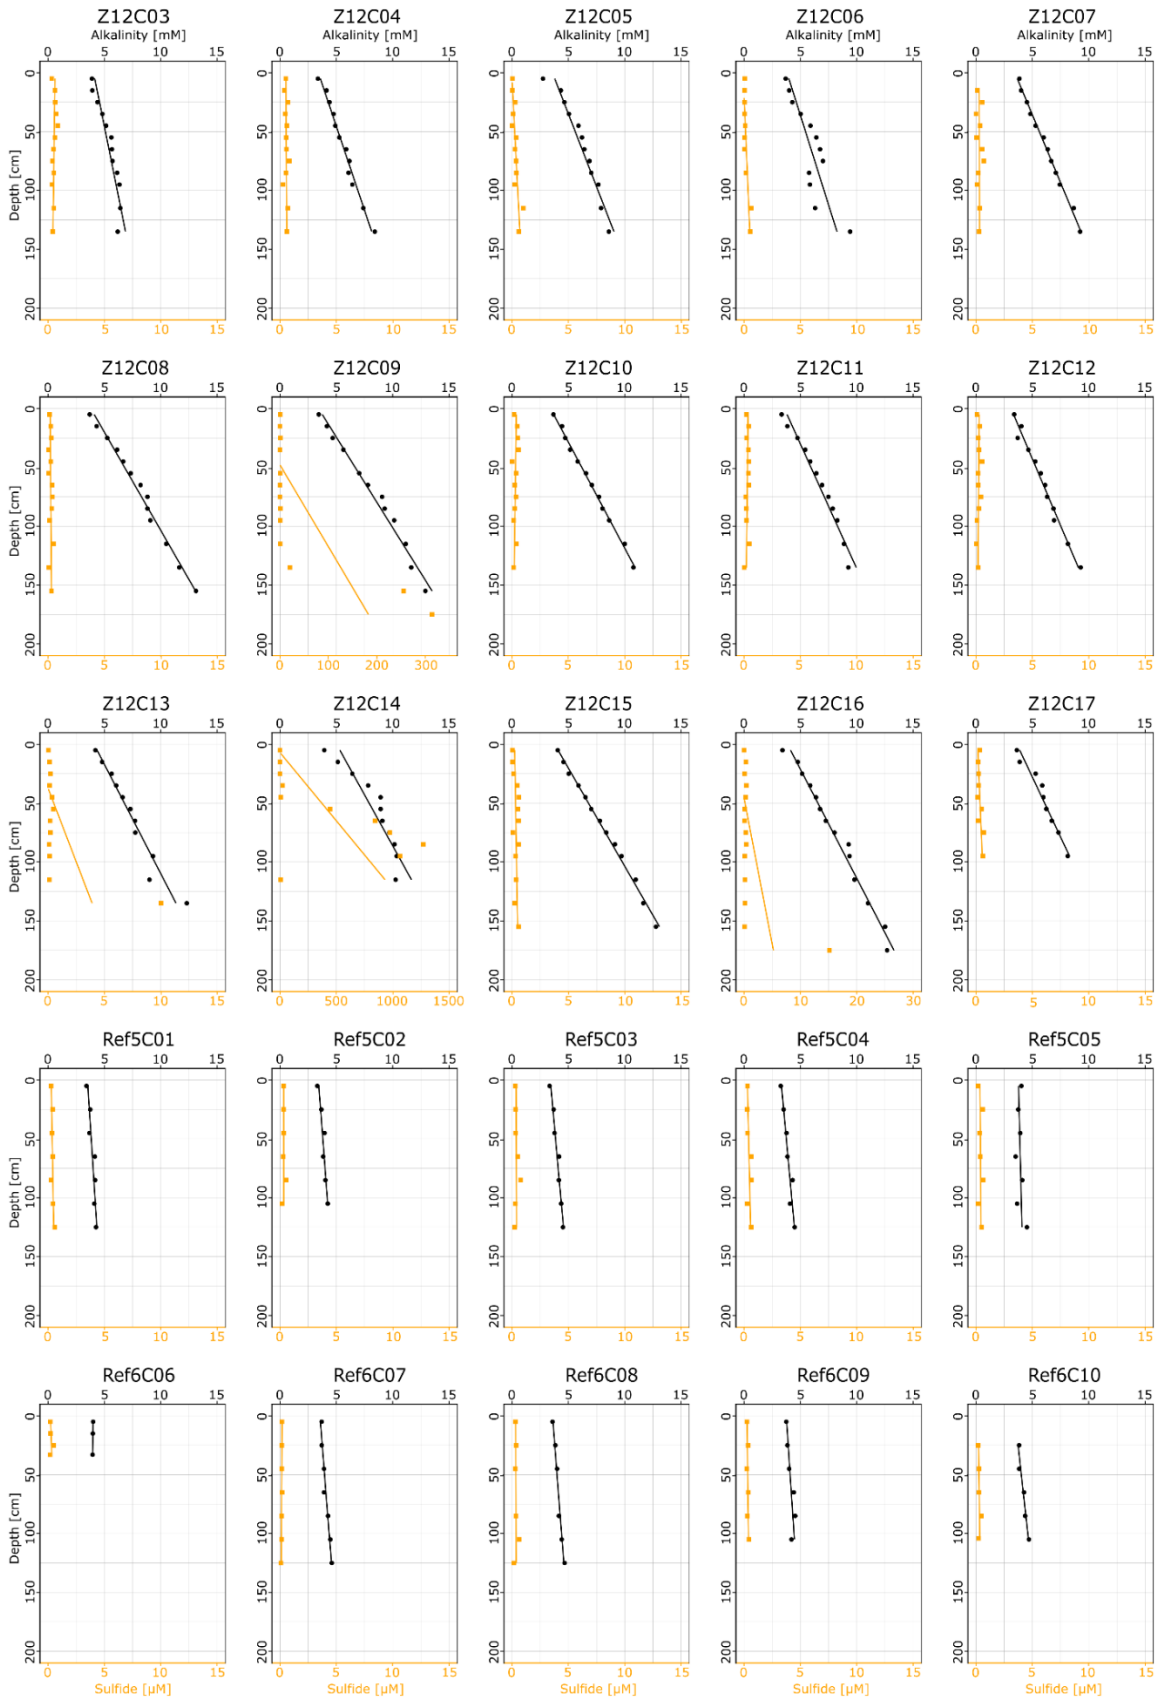

**Supplementary Figure S2.** Measured pore water alkalinity (black dots) and sulfide profiles (yellow dots) and their respective linear regressions

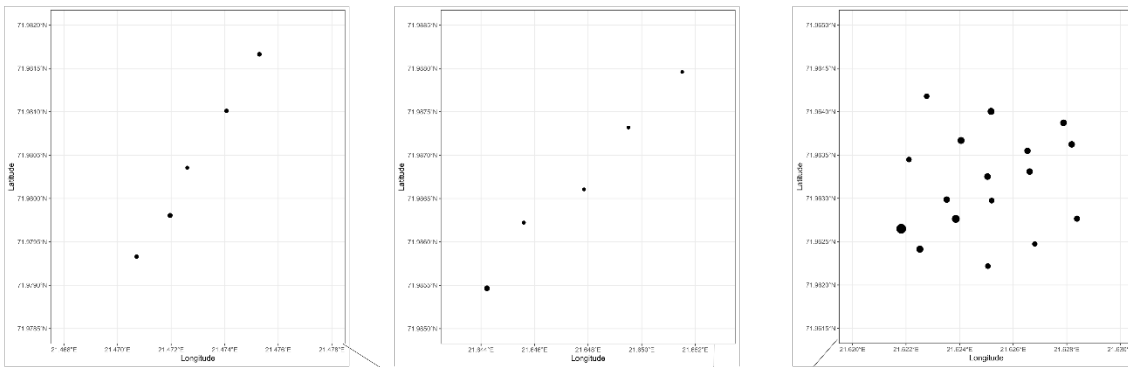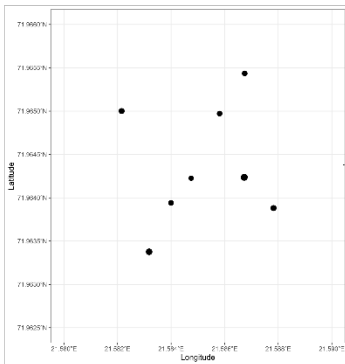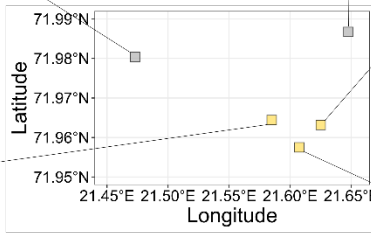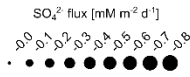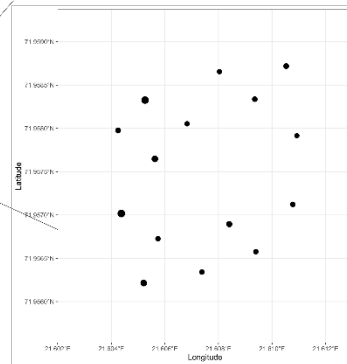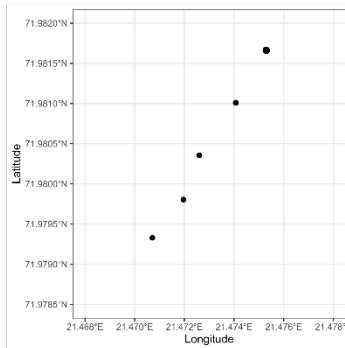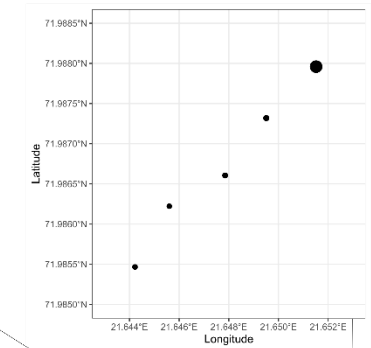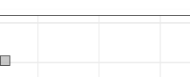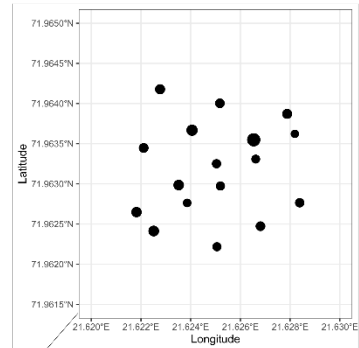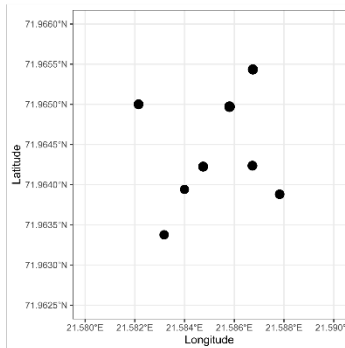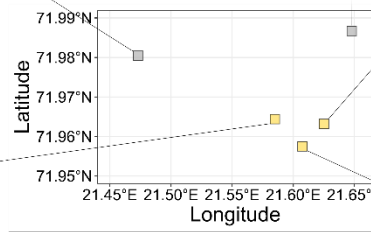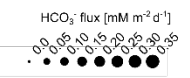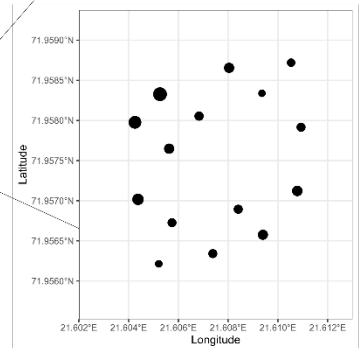



**Supplementary Figure S3.** Fluxes of  $\text{SO}_4^{2-}$  (top) and  $\text{HCO}_3^-$  (bottom) at each sampling site.

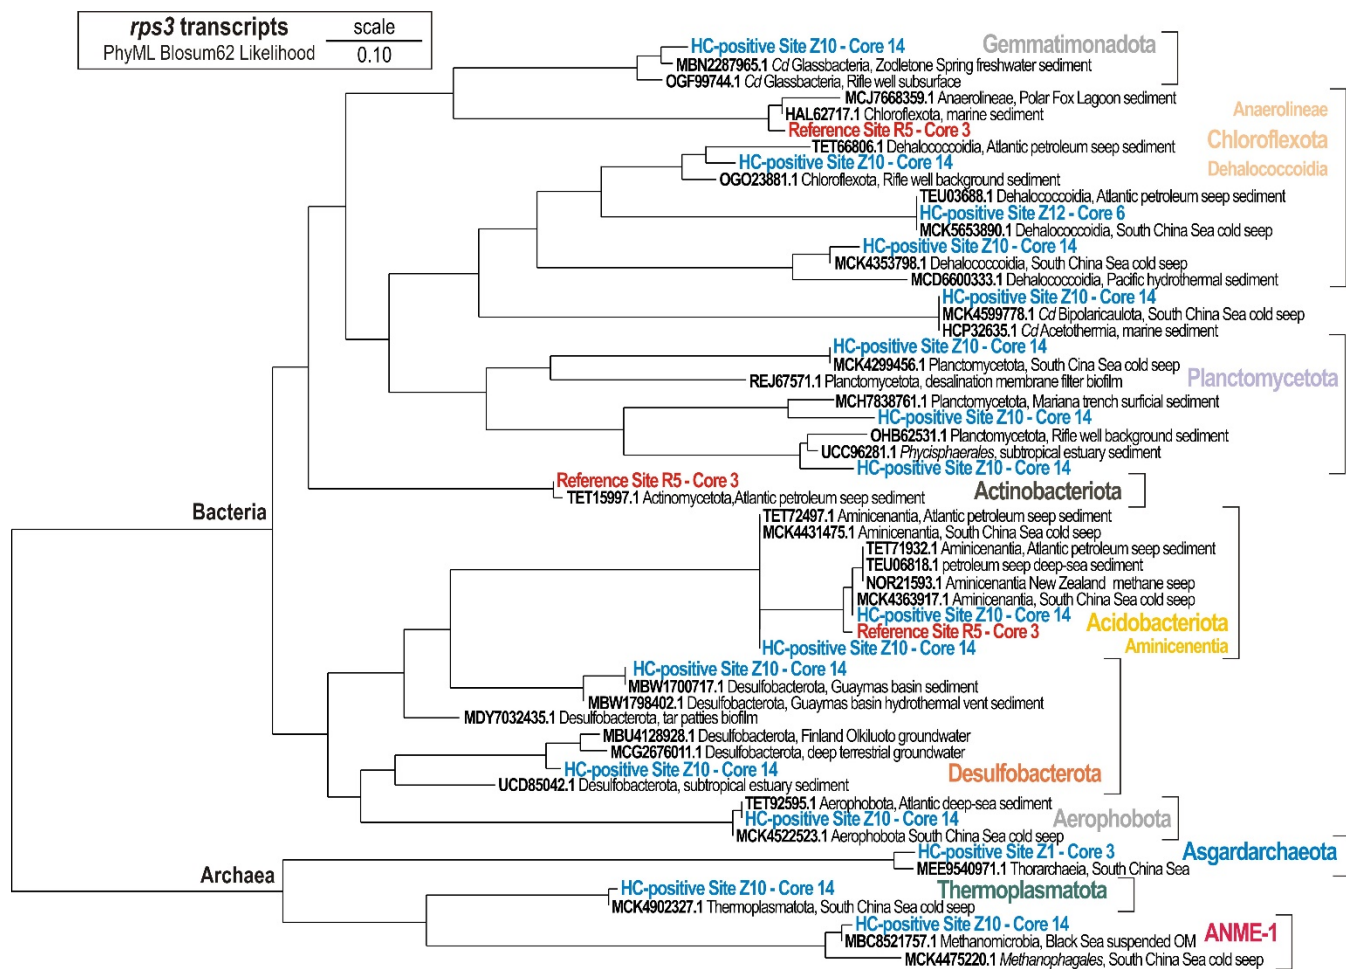

Supplementary Figure S4. Tree rps3

**rpoD transcripts**  
PhyML Blosum62 Likelihood

scale  
0.10

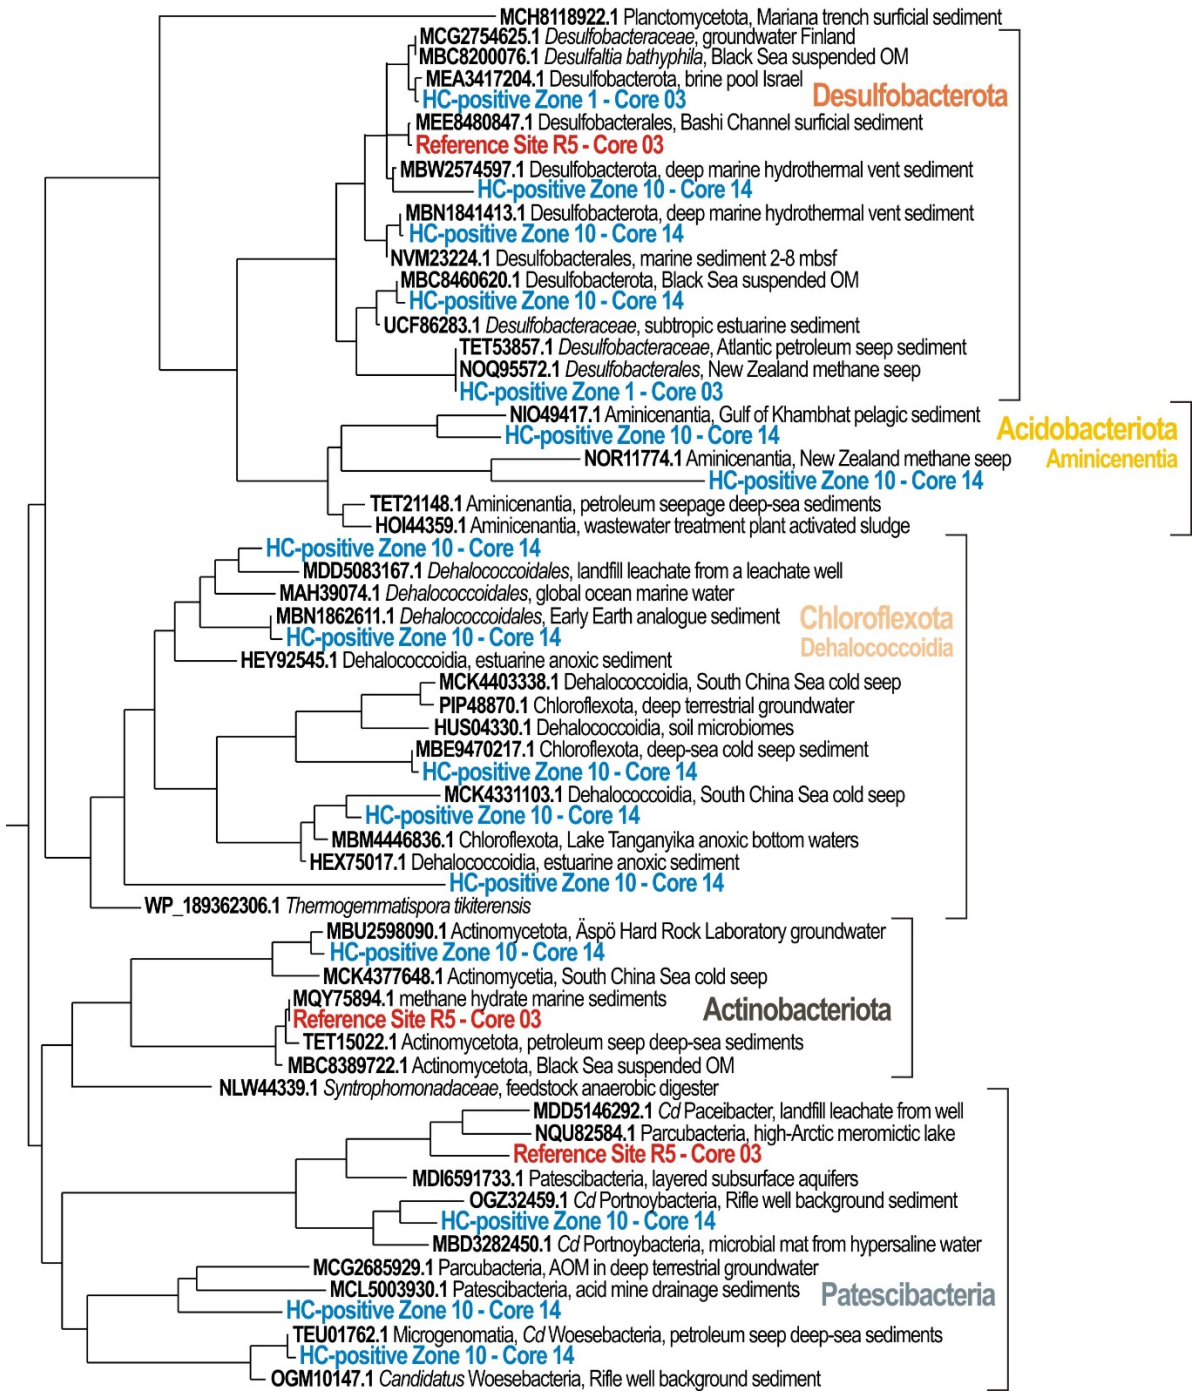

30

Supplementary Figure S5. Tree rpoD

**Supplementary Table S1.** Assembly statistics for all samples.

|              |                         | Sampling area     |          |          |                  |             |
|--------------|-------------------------|-------------------|----------|----------|------------------|-------------|
|              |                         | Zone 1            | Zone 10  | Zone 12  | Reference 5      | Reference 6 |
| <b>MetaG</b> | <b>Replicates</b>       | 4                 | 2        | 2        | 3                | 1           |
|              | <b>Reads</b>            | 25119029          | 13313285 | 12378731 | 21674342         | 7,700,785   |
|              | <b>Scaffolds</b>        | 228,637           | 153,150  | 144,433  | 285,446          | 116,305     |
|              | <b>Average length</b>   | 2,780             | 2,876    | 2,361    | 2,443            | 2,344       |
|              | <b>Predicted genes*</b> | 353,429           | 233,499  | 234,922  | 404,878          | 144,642     |
|              | <b>ORFs</b>             | 153,976           | 111,101  | 108,403  | 140,145          | 85,781      |
|              | <b>High-Q MAGs</b>      | 61                | 51       | 45       | 98               | 23          |
| <b>MetaT</b> | <b>Replicates</b>       | 1                 | 1        | 1        | 1                | 1           |
|              | <b>Sequencing depth</b> | 93.9 Gps (pooled) |          |          | 1.2 Gps (pooled) |             |
|              | <b>Mapped reads</b>     | 86.30%            | 94.60%   | 47.90%   | 95.20%           | 94.70%      |
|              | <b>ribosomal RNA</b>    | 72.5%             | 80.3%    | 20.5%    | 78.8%            | 78.2%       |
|              | <b>Assigned CDS</b>     | 8.9%              | 2.9%     | 15.7%    | 7.0%             | 5.6%        |
|              | <b>Predicted genes</b>  | 4,072             | 35,288   | 1,151    | 6,169            | 636         |
|              | <b>ORFs</b>             | 3,743             | 24,098   | 1,137    | 5,461            | 614         |

35 **Supplementary Table S2.** Pearson correlations

| <b>Zone</b> | <b>Core</b> | <b>SO<sub>4</sub><sup>2-</sup>/Alkalinity</b> | <b>SO<sub>4</sub><sup>2-</sup>/Sulfide</b> | <b>Alkalinity/Sulfide</b> |
|-------------|-------------|-----------------------------------------------|--------------------------------------------|---------------------------|
| Ref5        | 1           | -0.51                                         | N.A.                                       | N.A.                      |
| Ref5        | 2           | -0.60                                         | N.A.                                       | N.A.                      |
| Ref5        | 3           | -0.90                                         | N.A.                                       | N.A.                      |
| Ref5        | 4           | -0.57                                         | N.A.                                       | N.A.                      |
| Ref5        | 5           | 0.53                                          | N.A.                                       | N.A.                      |
| Ref6        | 6           | 1.00                                          | N.A.                                       | N.A.                      |
| Ref6        | 7           | -0.84                                         | N.A.                                       | N.A.                      |
| Ref6        | 8           | -0.98                                         | N.A.                                       | N.A.                      |
| Ref6        | 9           | -0.91                                         | N.A.                                       | N.A.                      |
| Ref6        | 10          | -0.76                                         | N.A.                                       | N.A.                      |
| Z01         | 1           | -0.99                                         | -0.86                                      | 0.87                      |
| Z01         | 2           | -0.97                                         | -0.98                                      | 0.92                      |
| Z01         | 3           | -0.99                                         | -0.93                                      | 0.99                      |
| Z01         | 4           | -0.98                                         | -0.92                                      | 0.88                      |
| Z01         | 5           | -0.99                                         | -0.98                                      | 0.97                      |
| Z01         | 6           | -1.00                                         | -0.65                                      | 0.60                      |
| Z01         | 7           | -0.96                                         | -0.89                                      | 0.75                      |
| Z01         | 8           | -0.99                                         | -0.68                                      | 0.61                      |
| Z01         | 9           | -0.82                                         | -0.97                                      | 0.91                      |
| Z01         | 10          | -0.97                                         | -0.52                                      | 0.55                      |
| Z01         | 11          | -0.97                                         | -0.99                                      | 0.93                      |
| Z01         | 12          | -0.98                                         | -0.97                                      | 0.94                      |
| Z01         | 14          | -0.97                                         | N.A.                                       | N.A.                      |
| Z01         | 15          | -0.99                                         | N.A.                                       | N.A.                      |
| Z01         | 16          | -0.99                                         | N.A.                                       | N.A.                      |
| Z10         | 1           | -0.95                                         | N.A.                                       | N.A.                      |
| Z10         | 7           | -1.00                                         | -1.00                                      | 1.00                      |
| Z10         | 8           | -0.76                                         | -0.62                                      | 0.98                      |
| Z10         | 9           | -0.99                                         | -0.90                                      | 0.94                      |

|     |    |       |       |      |
|-----|----|-------|-------|------|
| Z10 | 10 | -0.98 | N.A.  | N.A. |
| Z10 | 11 | -1.00 | N.A.  | N.A. |
| Z10 | 17 | -0.94 | -0.90 | 0.98 |
| Z12 | 1  | -0.97 | N.A.  | N.A. |
| Z12 | 2  | -0.95 | N.A.  | N.A. |
| Z12 | 3  | -0.58 | N.A.  | N.A. |
| Z12 | 4  | -0.90 | N.A.  | N.A. |
| Z12 | 5  | -0.92 | N.A.  | N.A. |
| Z12 | 6  | -0.82 | N.A.  | N.A. |
| Z12 | 7  | -0.98 | N.A.  | N.A. |
| Z12 | 8  | -0.99 | N.A.  | N.A. |
| Z12 | 9  | -0.99 | N.A.  | N.A. |
| Z12 | 10 | -0.99 | N.A.  | N.A. |
| Z12 | 11 | -0.97 | N.A.  | N.A. |
| Z12 | 12 | -0.99 | N.A.  | N.A. |
| Z12 | 13 | -0.97 | N.A.  | N.A. |
| Z12 | 14 | -0.86 | -0.87 | 0.63 |
| Z12 | 15 | -0.98 | N.A.  | N.A. |
| Z12 | 16 | -0.99 | N.A.  | N.A. |
| Z12 | 17 | -0.98 | N.A.  | N.A. |
